# Supplementary material
Source: PubMed Central journal article supplement (PMC6876863)

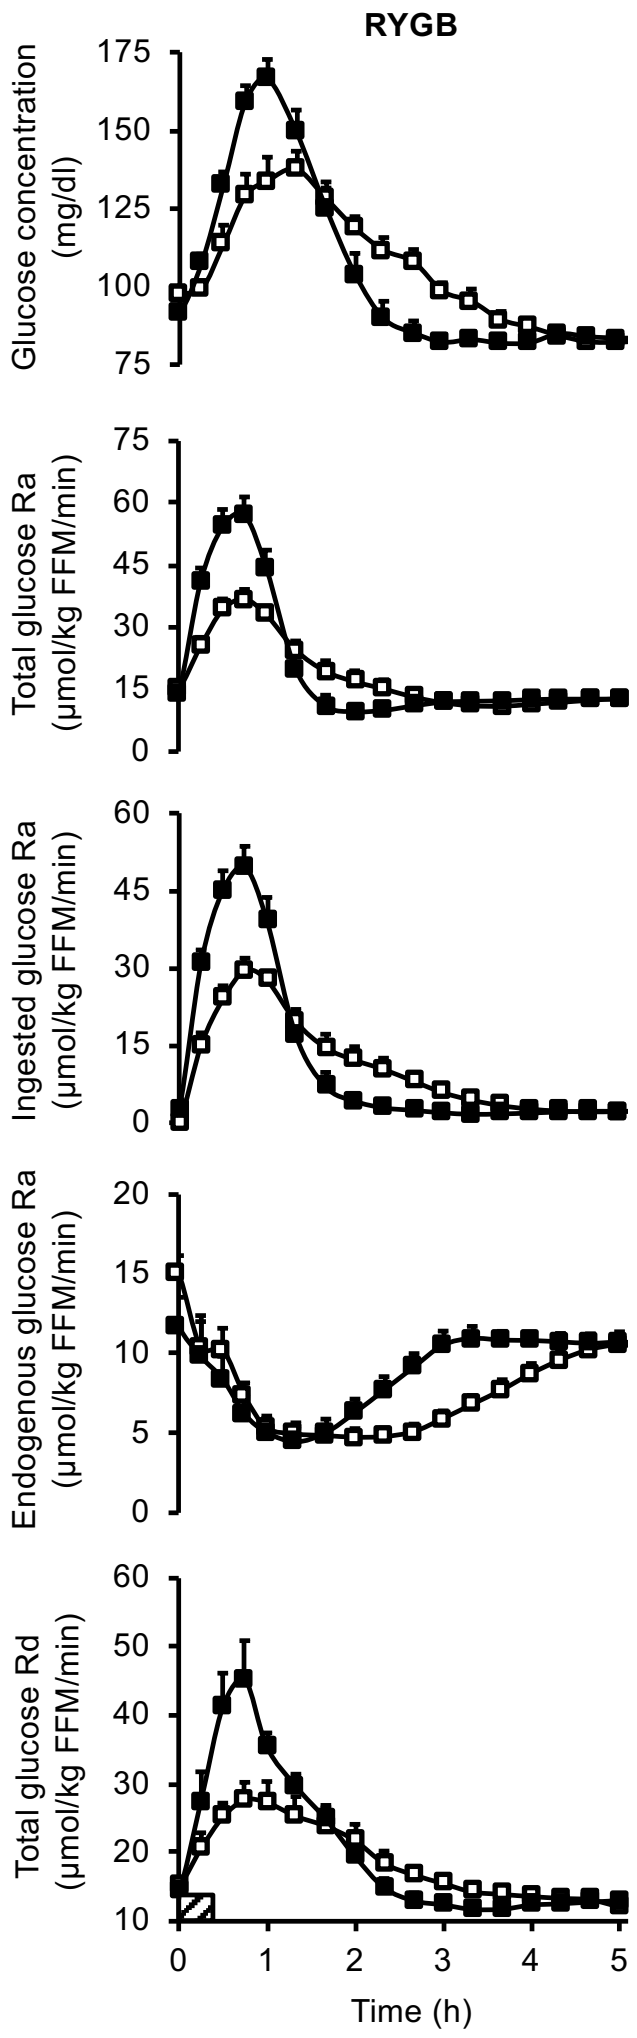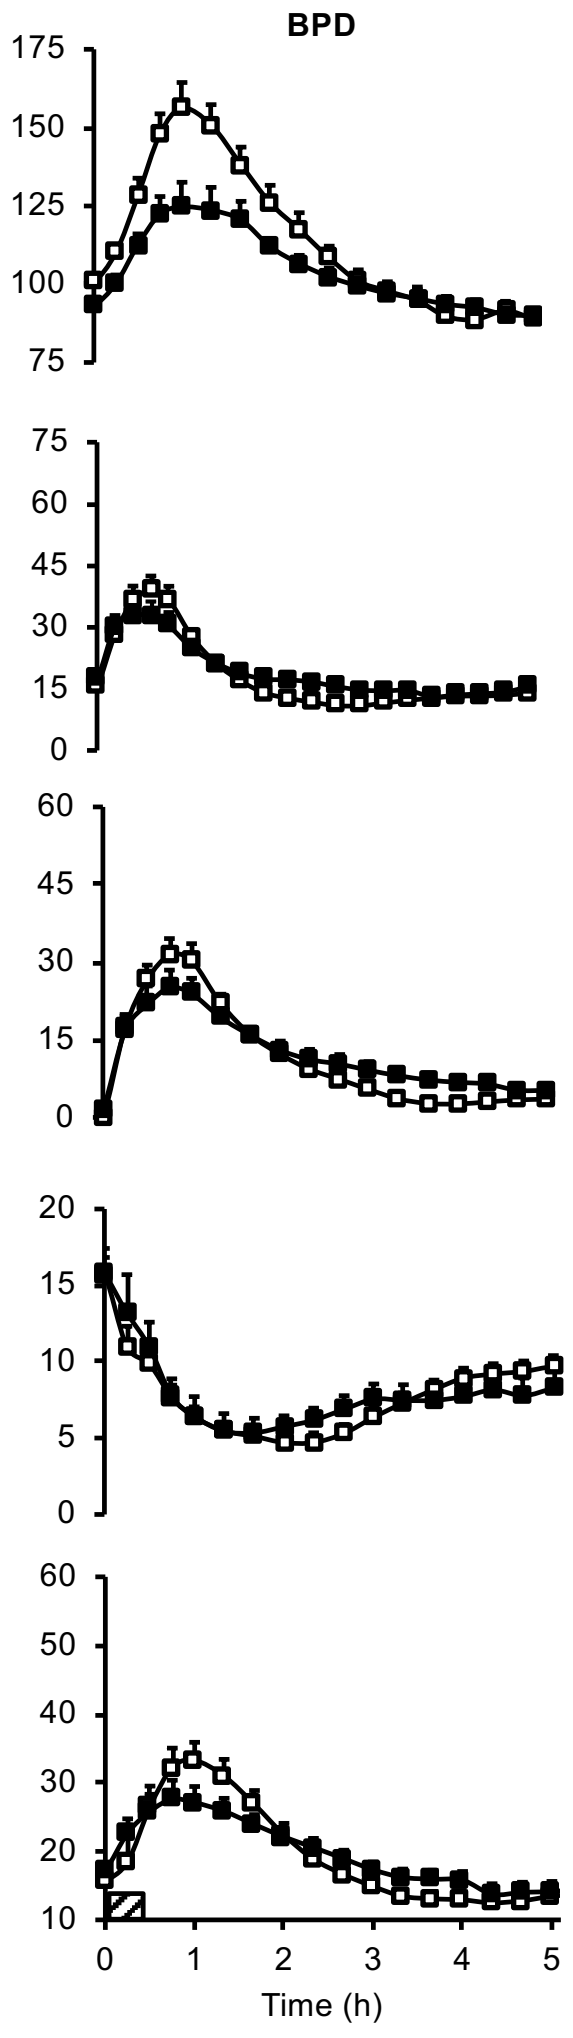

Supplement: NIHMS1543472-supplement-2.pdf [file NIHMS1543472-supplement-2.pdf]

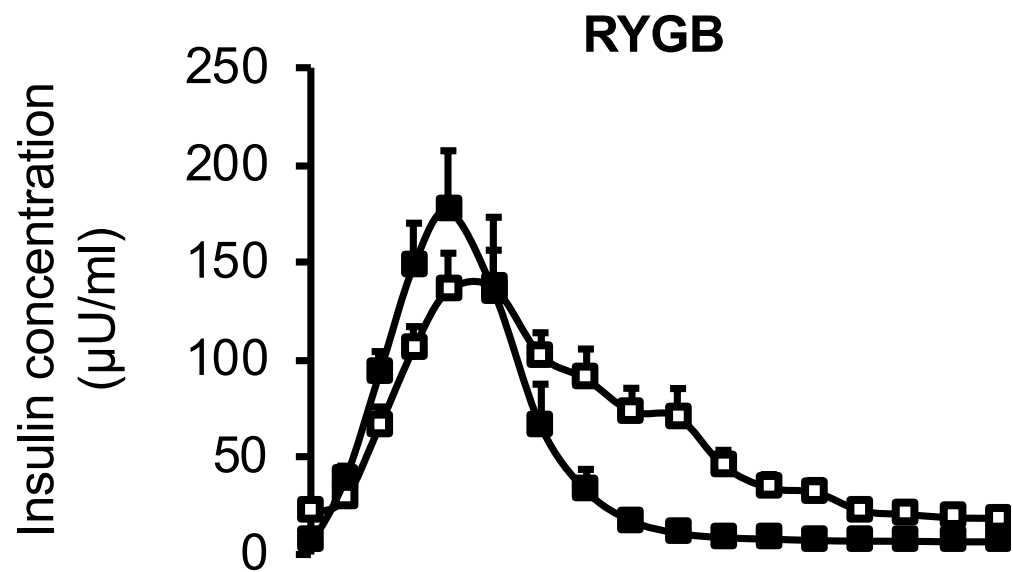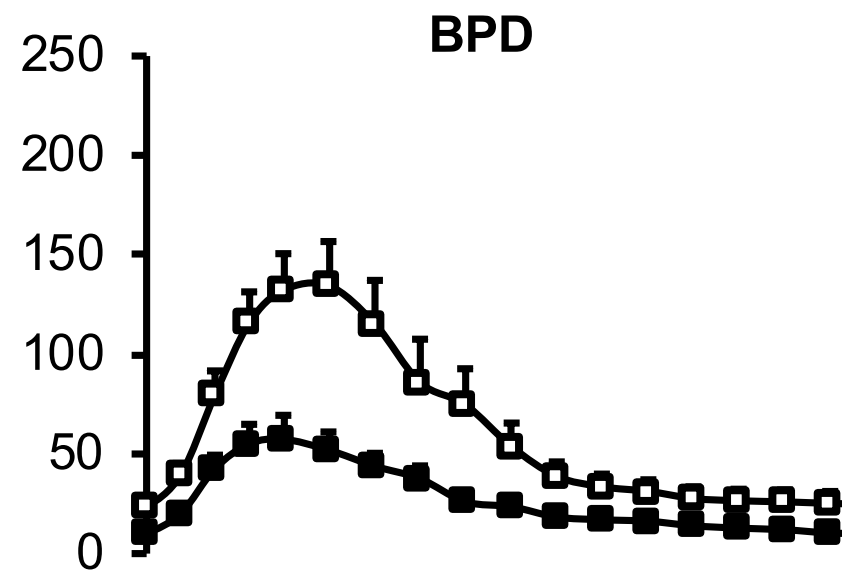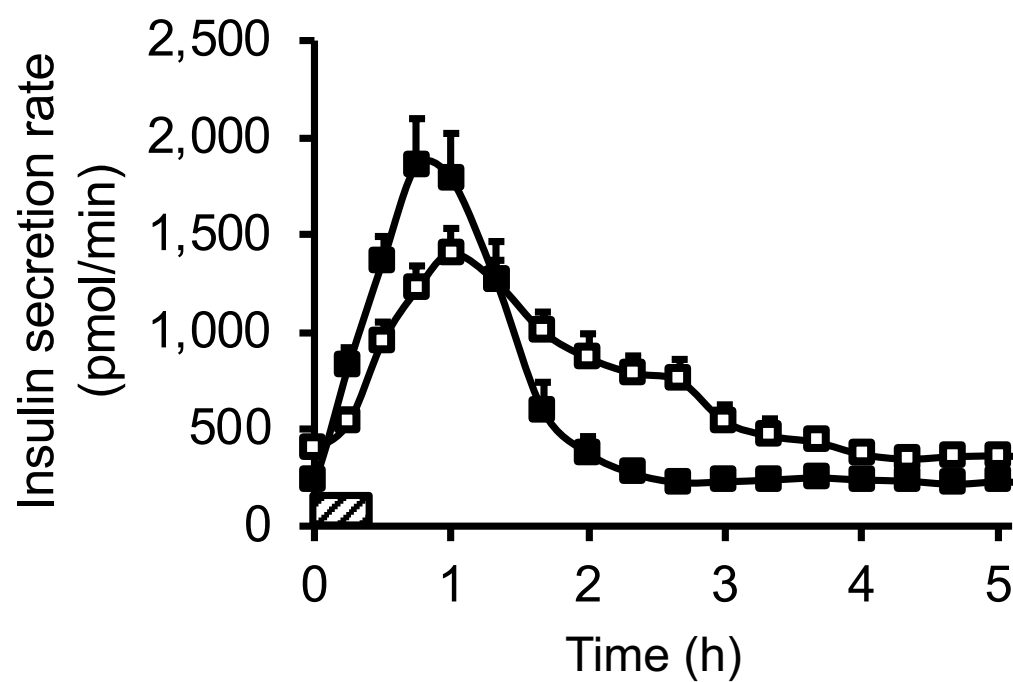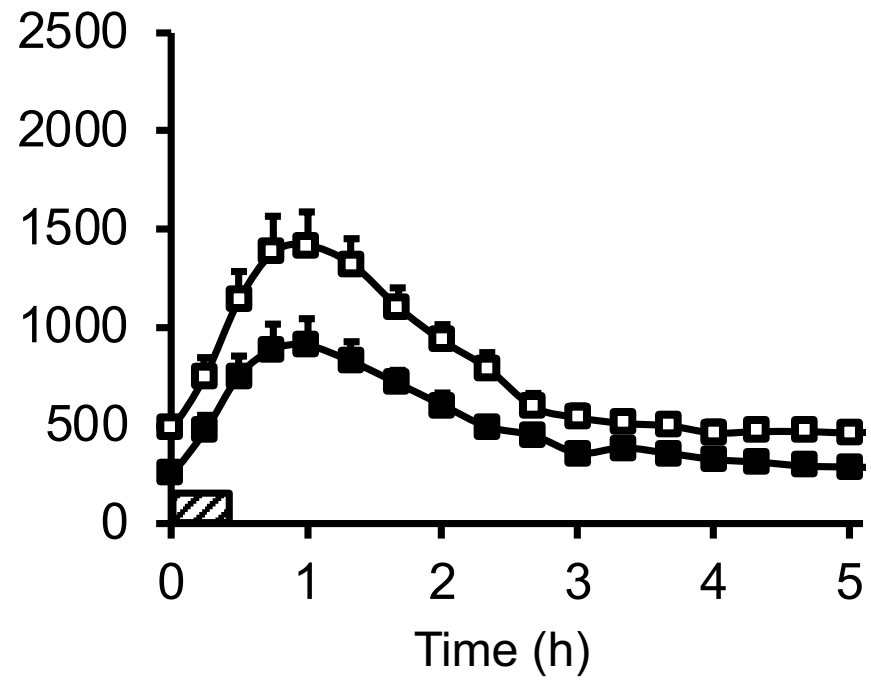

Supplement: NIHMS1543472-supplement-3.pdf [file NIHMS1543472-supplement-3.pdf]

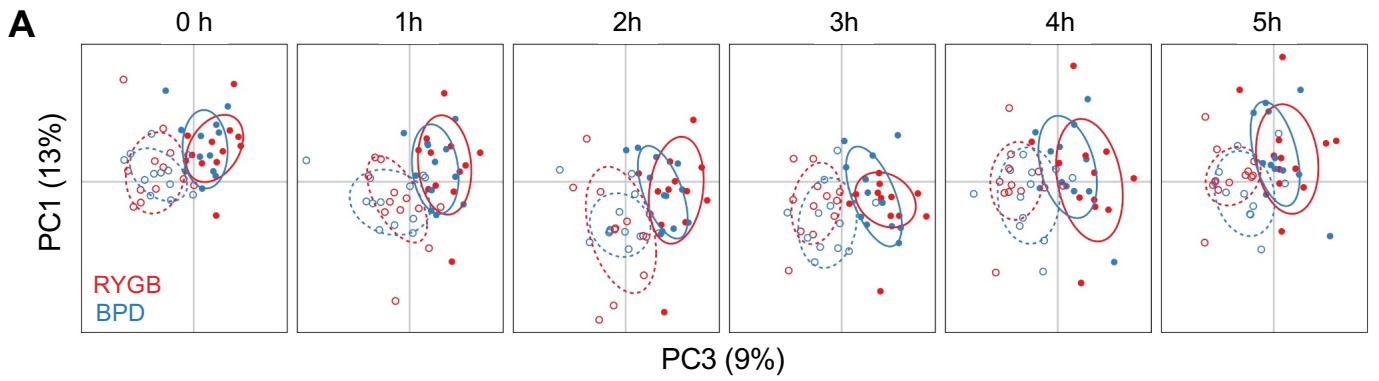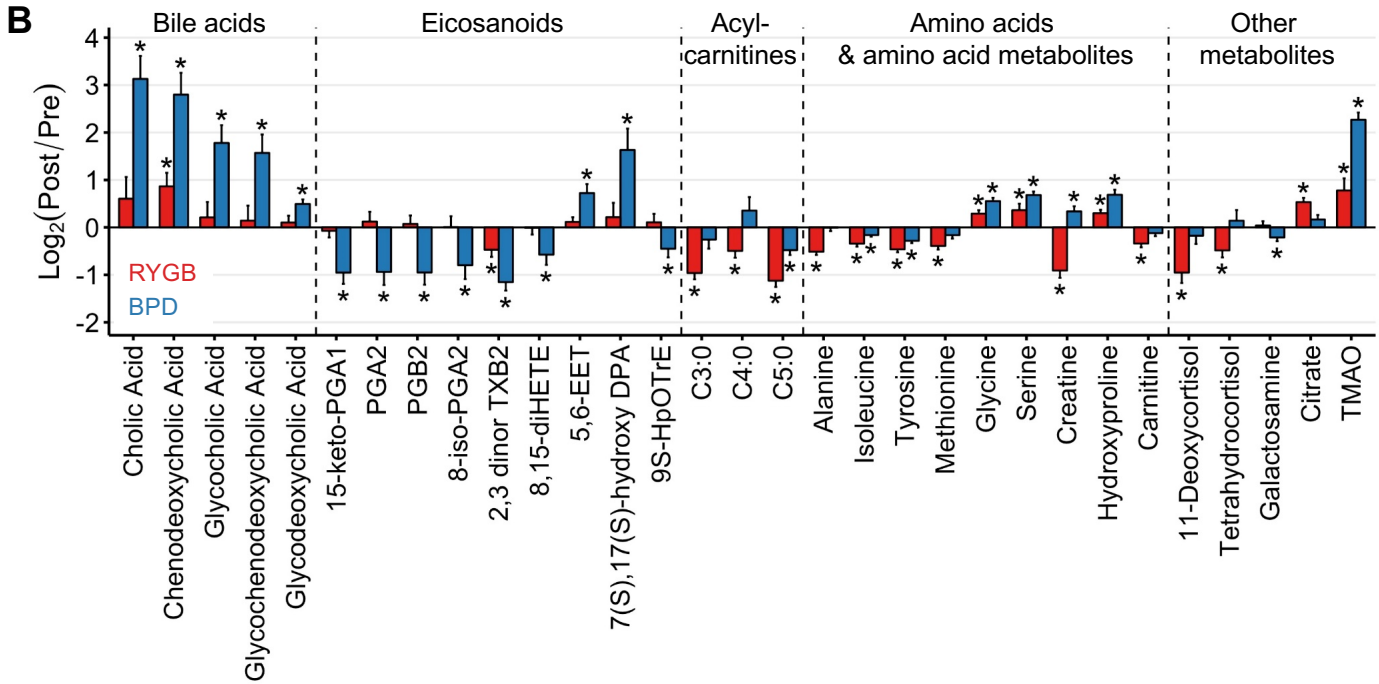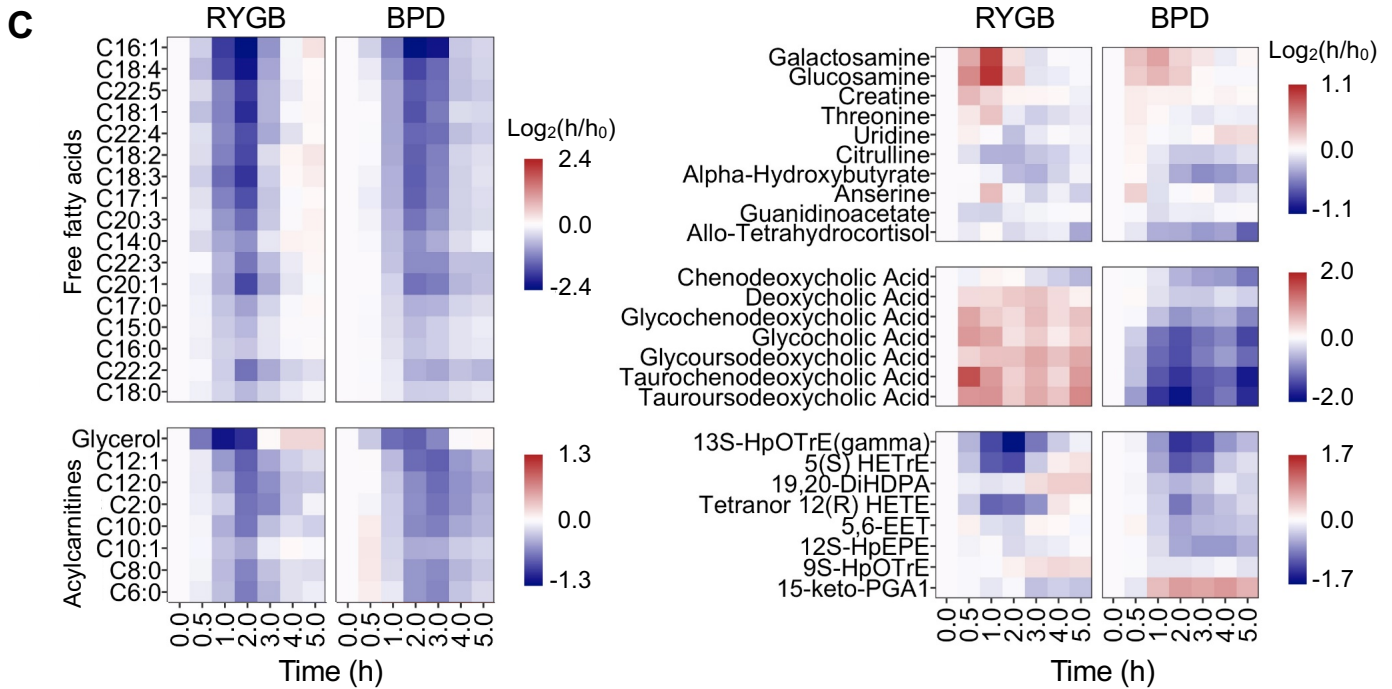

Supplement: NIHMS1543472-supplement-4.pdf [file NIHMS1543472-supplement-4.pdf]

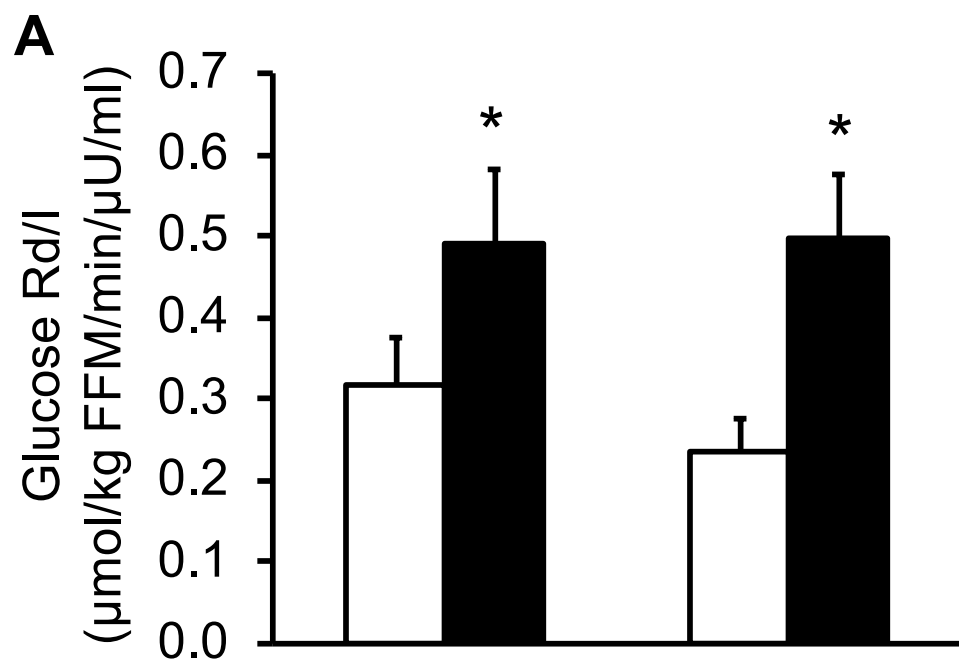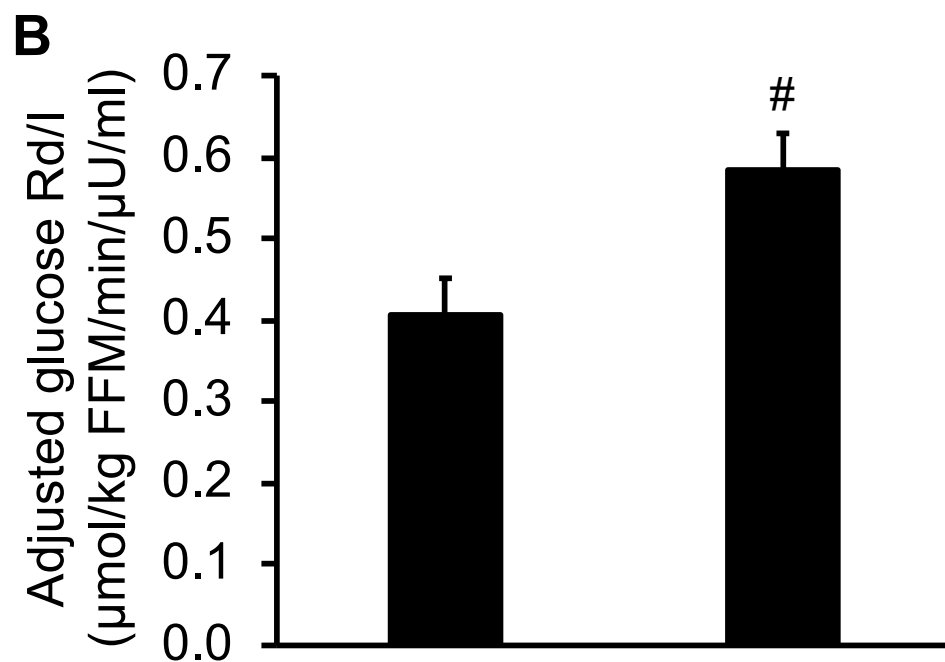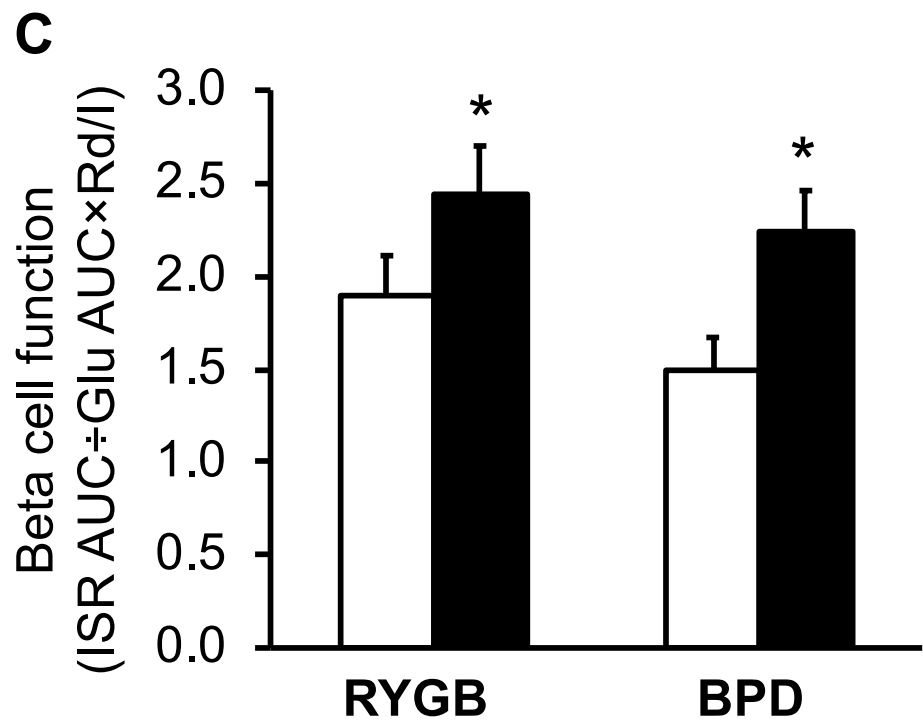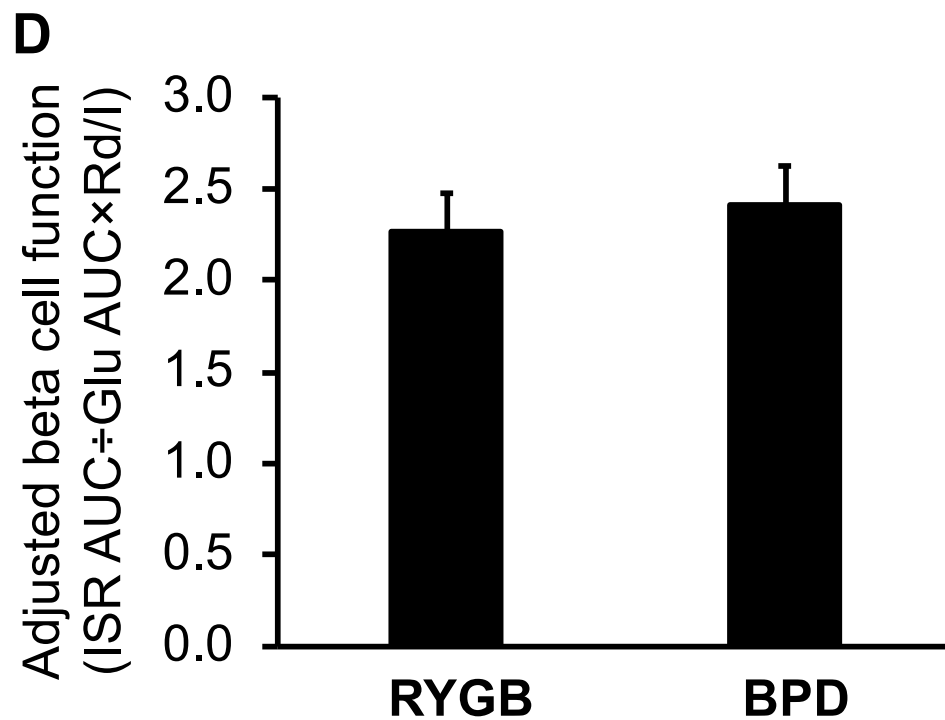

Supplement: NIHMS1543472-supplement-5.pdf [file NIHMS1543472-supplement-5.pdf]
